# Supplementary material for: A Diluted Electrolyte for Long-Life Sulfurized Polyacrylonitrile-Based Anode-Free Li-S Batteries
Source: MDPI journal article supplement (doi:10.3390/polym14163312), 2022-08-15
Supplement: s1 [file s1]

## Supporting Information

Ting Ma<sup>1,2</sup>, Xiuyun Ren<sup>3</sup>, Liang Hu<sup>4</sup>, Wanming Teng<sup>1,2</sup>, Xiaohu Wang<sup>2,5</sup>, Guanglei Wu<sup>3</sup>, Jun Liu<sup>2</sup>, Ding Nan<sup>1,2\*</sup>, Baohua Li<sup>6</sup>, Xiaoliang Yu<sup>4\*</sup>

<sup>1</sup> College of Chemistry and Chemical Engineering, Inner Mongolia University, Hohhot, 010021, China

<sup>2</sup> Inner Mongolia Key Laboratory of Graphite and Graphene for Energy Storage and Coating, School of Materials Science and Engineering, Inner Mongolia University of Technology, Hohhot, 010051, China

<sup>3</sup> College of Materials Science and Engineering, Qingdao University, Qingdao 266071, China

<sup>4</sup> Department of Mechanical Engineering, Research Institute for Smart Energy, The Hong Kong Polytechnic University, Hong Kong, China

<sup>5</sup> Rising Graphite Applied Technology Research Institute, Chinese Graphite Industrial Park-Xinghe, Ulanqab, Inner Mongolia, 013650, China

<sup>6</sup> Shenzhen Key Laboratory on Power Battery Safety and Shenzhen Geim Graphene Center, Tsinghua Shenzhen International Graduate School (SIGS), Shenzhen, 518071 China

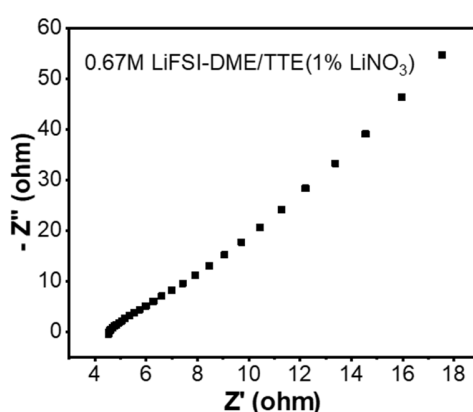

Figure S1 EIS spectra of symmetrical cells (stainless steel/separator/stainless steel) using 0.67 M LiFSI-DME/TTE (LiNO<sub>3</sub>).

The ionic conductivity of electrolyte corresponds to the migration ability of lithium ions in the electrolyte and plays a key role in the battery performance, especially the multiplicity performance. We assembled stainless steel symmetric cells to test the electrochemical impedance spectra of both electrolytes. The ionic conductivity  $\sigma$  can be calculated by the equation  $\sigma = d/RS$ , where  $d$  is the diaphragm thickness of 25  $\mu\text{m}$ ,  $S$  is the contact area of 2  $\text{cm}^2$  and  $R$  is the impedance. The impedance of the electrolyte was 4.5  $\Omega$ , and the conductivity was calculated to be  $2.78 \times 10^{-4} \text{ S cm}^{-1}$ .

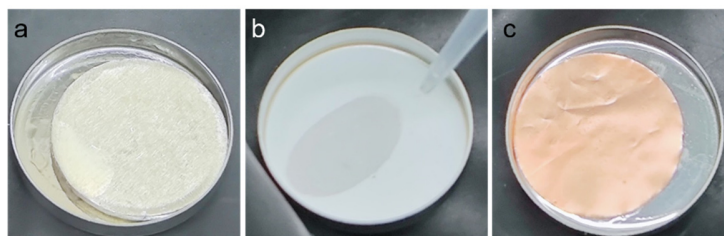

Figure S2 Optical images showing wettability of 0.67 M LiFSI-DME/TTE (LiNO<sub>3</sub>) on lithium foil (a), separator (b), and copper foil (c).

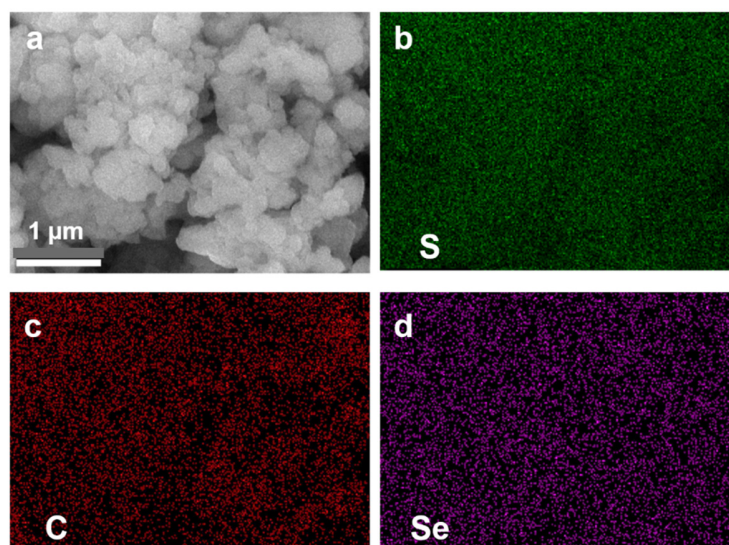

Figure S3 EDS elemental mapping images of the pPAN/SeS<sub>2</sub> composite for (b) sulfur, (c) carbon and (d) selenium.

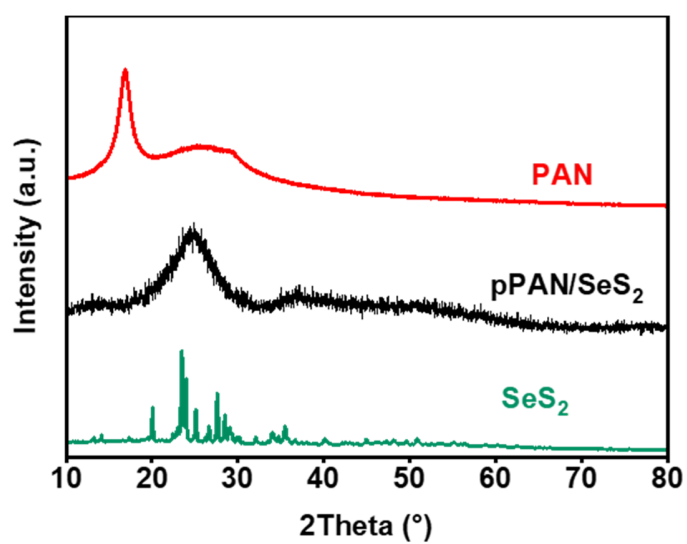

Figure S4 XRD of pPAN/SeS<sub>2</sub> (black), PAN (red), SeS<sub>2</sub> (green).
